# Supplementary material for: Treatment with Granulocyte-colony Stimulating Factor (G-CSF) is not associated with Increased Risk of Brain Metastasis in Patients with De Novo Stage IV Breast Cancer
Source: PubMed Central journal article supplement (PMC8364654; doi:10.7150/jca.63159), 2021-07-25
Supplement: jcav12p5687s1.pdf [file jcav12p5687s1.pdf]

**Figure S1**

Kaplan-Meier curve with log-rank test in brain metastasis free survival (BMFS)

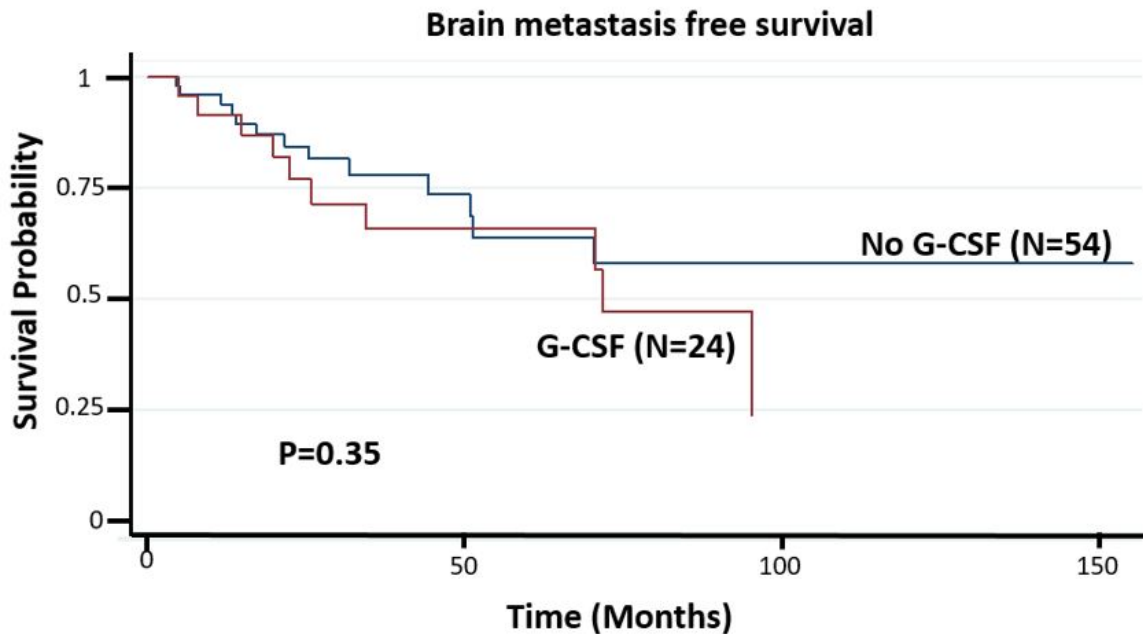

Figure S1. Kaplan-Meier curve with log-rank test in brain metastasis free survival (BMFS)

**Table S1. Cox proportional hazard models in brain metastasis free survival**

|                            | Univariate analysis     |          | Multivariate analysis   |          |
|----------------------------|-------------------------|----------|-------------------------|----------|
|                            | Hazard Ratio<br>(95%CI) | P-Values | Hazard Ratio<br>(95%CI) | P-Values |
| <b>Age (range, median)</b> | 0.98 (0.94-1.01)        | 0.17     |                         |          |
| <b>Ethnicity</b>           |                         |          |                         |          |
| Caucasian                  | Ref                     |          | Ref                     |          |
| African American           | 3.36 (1.12-10.06)       | 0.03     | 2.65 (0.84-8.36)        | 0.1      |
| Others                     | 2.07 (0.72-5.96)        | 0.18     | 2.86 (0.87-9.37)        | 0.08     |
| <b>Menopausal status</b>   |                         |          |                         |          |
| Premenopause               | Ref                     |          |                         |          |
| Postmenopause              | 0.54 (0.23-1.28)        | 0.16     |                         |          |
| <b>Smoking Status</b>      |                         |          |                         |          |
| No                         | Ref                     |          |                         |          |
| Yes                        | 0.96 (0.37-2.45)        | 0.93     |                         |          |
| <b>Active PE/DVT</b>       |                         |          |                         |          |
| No                         | Ref                     |          | Ref                     |          |
| Yes                        | 2.98 (1.23-7.17)        | 0.02     | 3.08 (1.1-8.6)          | 0.03     |
| <b>Hormonal Status</b>     |                         |          |                         |          |
| Negative                   | Ref                     |          |                         |          |

|                          |                  |      |                  |      |
|--------------------------|------------------|------|------------------|------|
| <b>Positive</b>          | 1.42 (0.42-4.81) | 0.57 |                  |      |
| <b>HER2 status</b>       |                  |      |                  |      |
| <b>Negative</b>          | Ref              |      |                  |      |
| <b>Positive</b>          | 0.96 (0.41-2.24) | 0.92 |                  |      |
| <b>Histology</b>         |                  |      |                  |      |
| <b>Ductal</b>            | Ref              |      |                  |      |
| <b>Lobular</b>           | 1.62 (1.47-5.56) | 0.45 |                  |      |
| <b>Others</b>            | 0.63 (0.14-2.74) | 0.54 |                  |      |
| <b>Hormone treatment</b> |                  |      |                  |      |
| <b>No</b>                | Ref              |      |                  |      |
| <b>Yes</b>               | 0.72 (0.26-1.98) | 0.53 |                  |      |
| <b>HER2 treatment</b>    |                  |      |                  |      |
| <b>No</b>                | Ref              |      |                  |      |
| <b>Yes</b>               | 1.24 (0.54-2.87) | 0.62 |                  |      |
| <b>Immunotherapy</b>     |                  |      |                  |      |
| <b>No</b>                | Ref              |      |                  |      |
| <b>Yes</b>               | 1.43 (0.48-4.25) | 0.53 |                  |      |
| <b>G-CSF use</b>         |                  |      |                  |      |
| <b>No</b>                | Ref              |      | Ref              |      |
| <b>Yes</b>               | 1.33 (0.57-3.1)  | 0.52 | 0.85 (0.32-2.22) | 0.74 |

**Table S2. Cox proportional hazard models in overall survival**

|                            | Univariate analysis   |          | Multivariate analysis |          |
|----------------------------|-----------------------|----------|-----------------------|----------|
|                            | Odds Ratio<br>(95%CI) | P-Values | Odds Ratio<br>(95%CI) | P-Values |
| <b>Age (range, median)</b> | 1.01 (0.98-1.04)      | 0.5      |                       |          |
| <b>Ethnicity</b>           |                       |          |                       |          |
| Caucasian                  | Ref                   |          | Ref                   |          |
| African American           | 3.94 (1.39-11.11)     | 0.01     | 4.78 (1.62-14.1)      | 0.005    |
| Others                     | 1.59 (0.57-4.47)      | 0.38     | 2.85 (0.82-9.82)      | 0.1      |
| <b>Menopausal status</b>   |                       |          |                       |          |
| Premenopause               | Ref                   |          |                       |          |
| Postmenopause              | 0.96 (0.45-2.06)      | 0.92     |                       |          |
| <b>Smoking Status</b>      |                       |          |                       |          |
| No                         | Ref                   |          |                       |          |
| Yes                        | 1.12 (0.51-2.5)       | 0.77     |                       |          |
| <b>Active PE/DVT</b>       |                       |          |                       |          |
| No                         | Ref                   |          |                       |          |
| Yes                        | 2.16 (0.93-5.06)      | 0.08     |                       |          |
| <b>Hormonal Status</b>     |                       |          |                       |          |
| Negative                   | Ref                   |          |                       |          |
| Positive                   | 0.52 (0.21-1.25)      | 0.14     |                       |          |
| <b>HER2 status</b>         |                       |          |                       |          |
| Negative                   | Ref                   |          | Ref                   |          |
| Positive                   | 0.29 (0.11-0.75)      | 0.01     | 0.66 (0.09-4.96)      | 0.68     |
| <b>Histology</b>           |                       |          |                       |          |
| Ductal                     | Ref                   |          |                       |          |
| Lobular                    | 1.34 (0.39-4.62)      | 0.64     |                       |          |
| Others                     | 1.44 (0.53-3.9)       | 0.48     |                       |          |
| <b>Hormone treatment</b>   |                       |          |                       |          |
| No                         | Ref                   |          |                       |          |
| Yes                        | 0.79 (0.29-2.13)      | 0.64     |                       |          |
| <b>HER2 treatment</b>      |                       |          |                       |          |
| No                         | Ref                   |          | Ref                   |          |
| Yes                        | 0.3 (0.11-0.79)       | 0.02     | 0.46 (0.06-3.46)      | 0.45     |
| <b>Immunotherapy</b>       |                       |          |                       |          |
| No                         | Ref                   |          |                       |          |
| Yes                        | 0.93 (0.28-3.15)      | 0.91     |                       |          |
| <b>G-CSF use</b>           |                       |          |                       |          |
| No                         | Ref                   |          | Ref                   |          |
| Yes                        | 0.53 (0.21-1.31)      | 0.17     | 0.36 (0.11-1.14)      | 0.08     |
